# Supplementary material for: After the Infection: A Survey of Pathogens and Non-communicable Human Disease
Source: bioRxiv or medRxiv preprint supplement (doi:10.1101/2023.09.14.23295428), 2024-12-30
Supplement: Supplementary file [file media-1.pdf]

# Covariate Use Across All Models

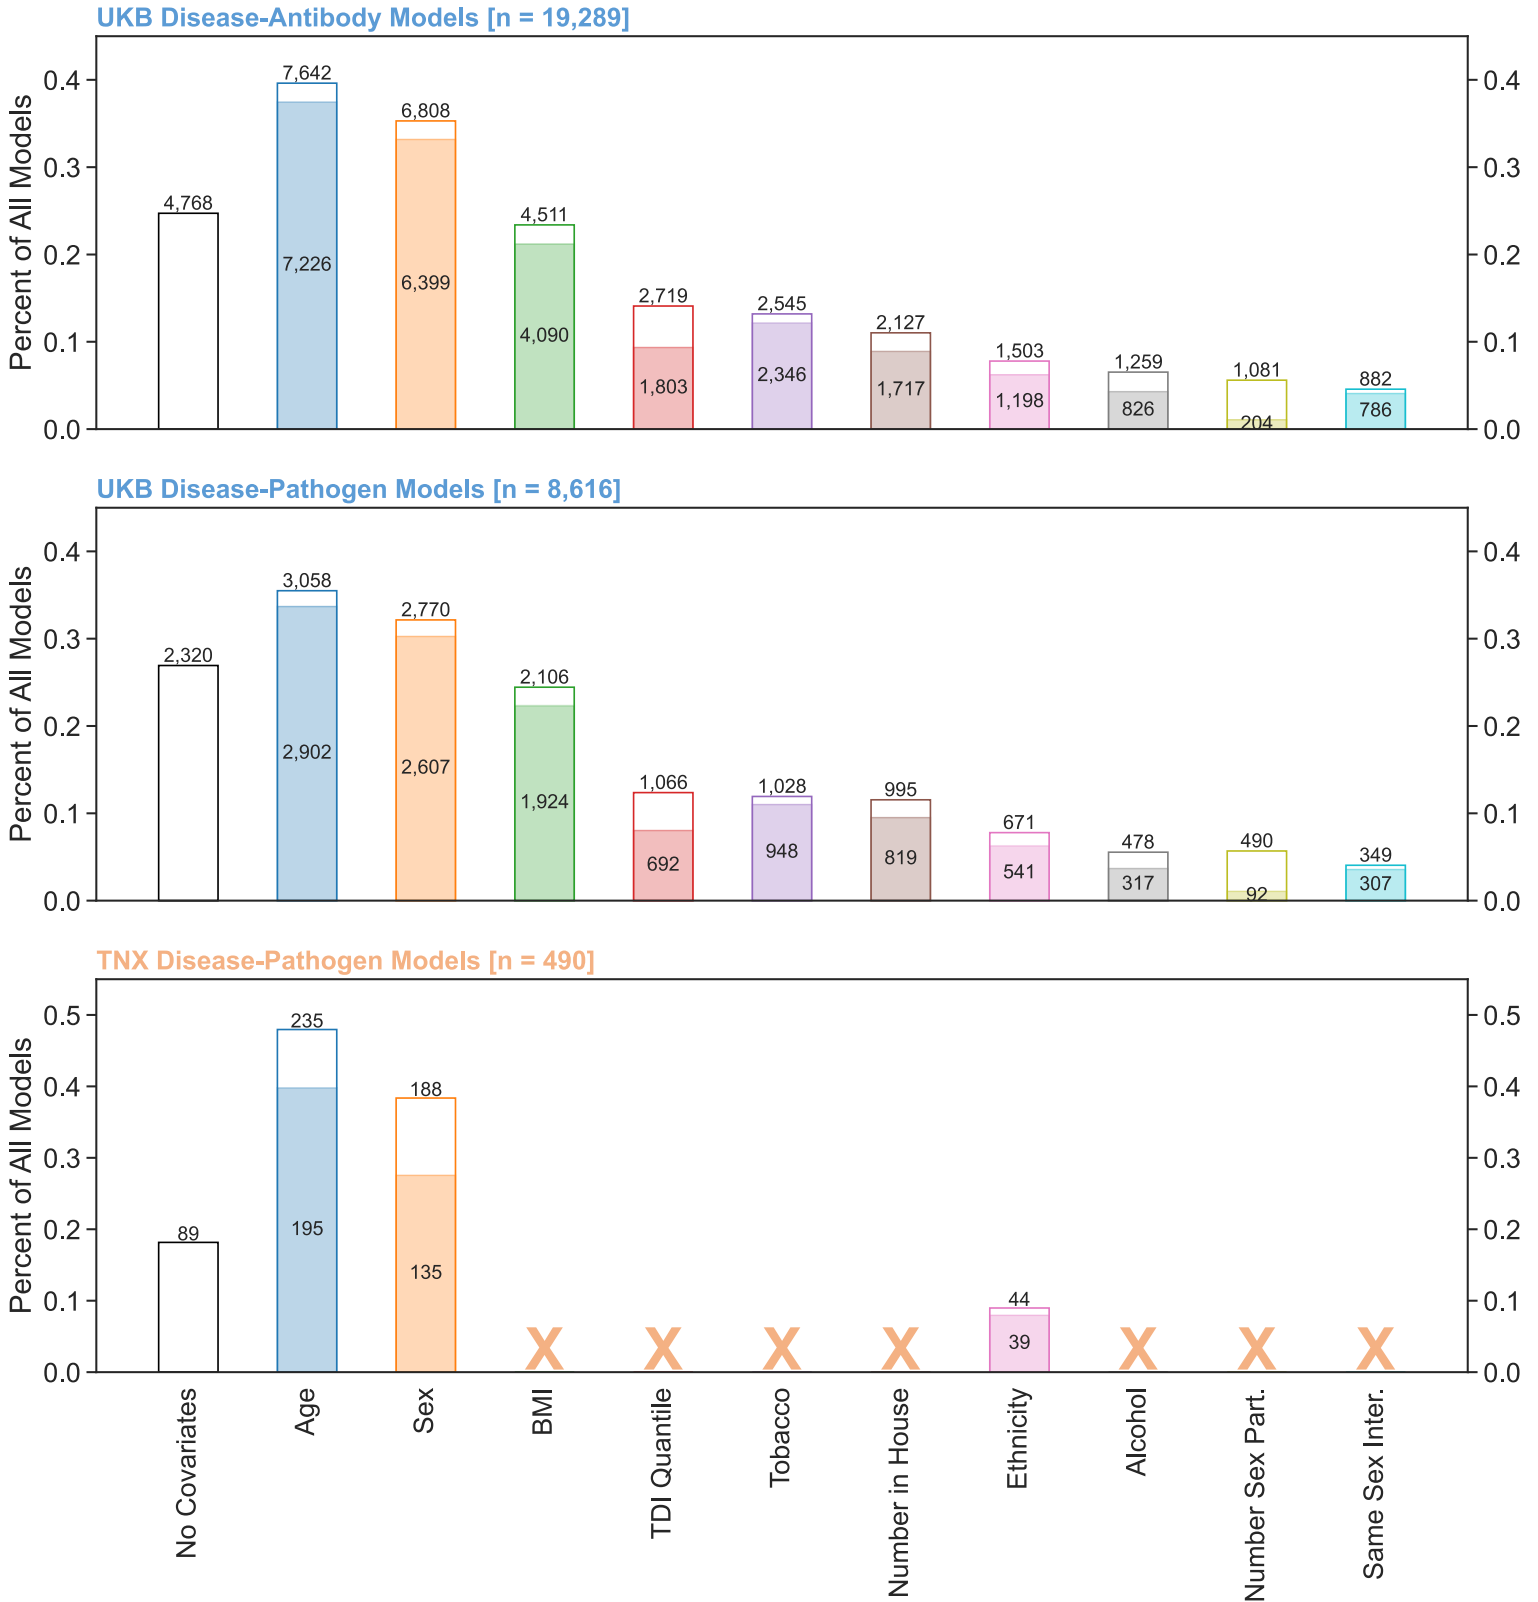

**Figure S1 | Covariate use across models.**

Bar charts summarizing covariate usage in antibody-disease and pathogen-disease tests across the discovery and replication cohorts. The height of each bar indicates the percentage of all models that were adjusted for the corresponding sociodemographic or health-related covariate. In order to be included in an antibody-disease model for adjustment, a covariate had to be significantly associated (unadjusted  $p < 0.05$ ) in univariate tests with both the disease status and the titer level separately (Supplemental Table 2). The filled portion of each bar indicates the percent of the final multivariate logistic regression models in which the covariate remained significant (unadjusted  $p < 0.05$ ). The covariates that were unavailable in the TNX cohort are marked by an orange "X".

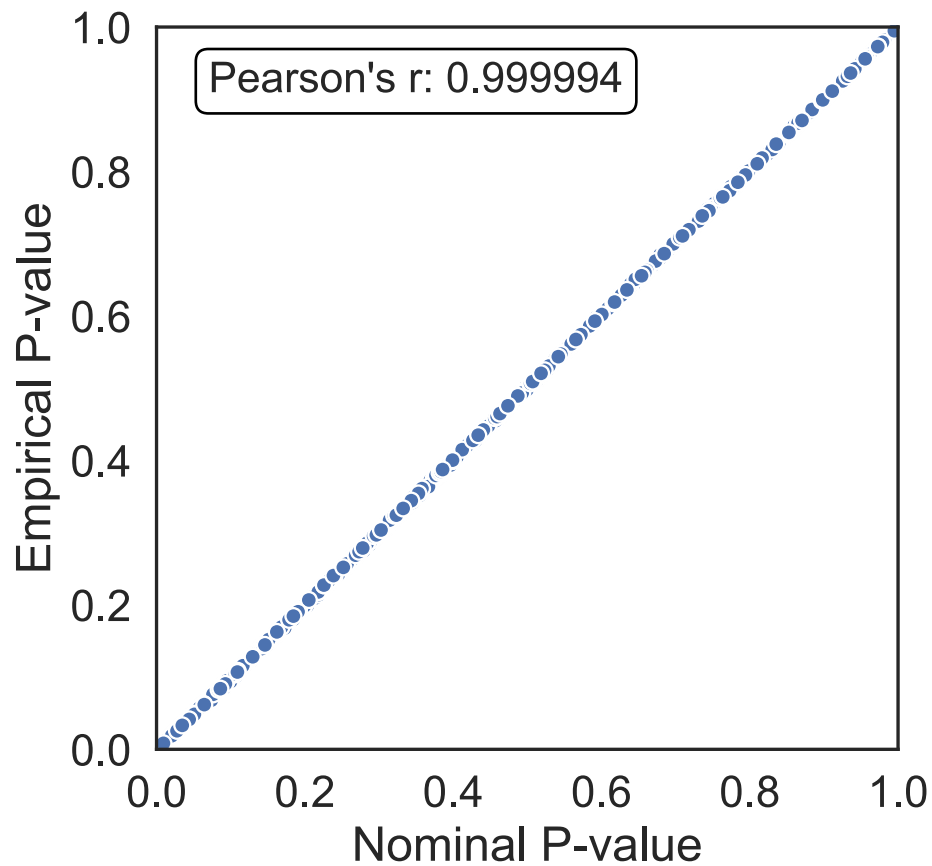

**Figure S2 | Nominal versus empirical p-values across all UK Biobank antibody-disease models.**

Comparison of the nominal and empirical p-values for all discovery cohort antibody-disease models. To calculate empirical p-values, 10,000 permutations of each antibody-disease model were performed combining all permutations for a particular disease into a per-disease null distribution, yielding 450,000 permutation results (see Methods). The nominal p-value for a specific antibody-disease model was compared to the disease-specific null distribution to calculate the empirical p-value.

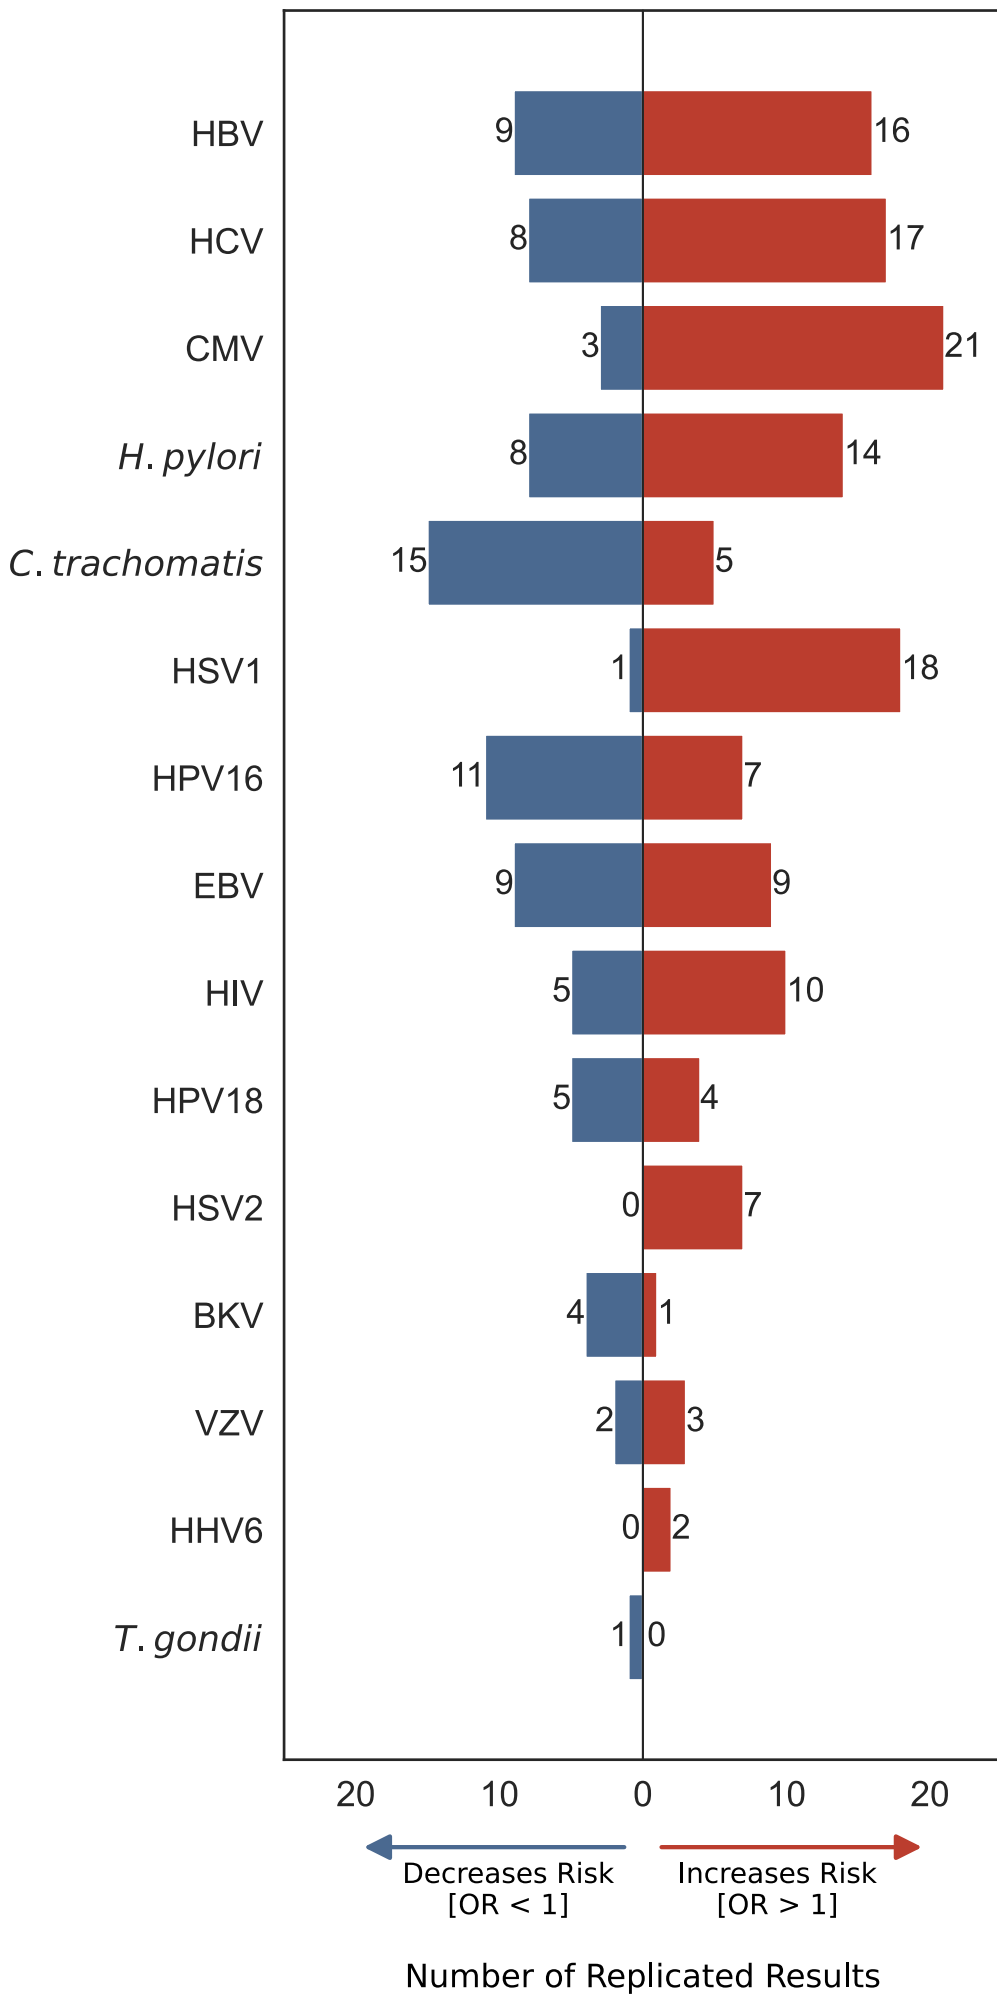

**Figure S3 | Replicated results split by pathogen and effect direction.**

Split bar chart showing the number of replicated “risk” and “protective” associations found for each of the pathogens. The total number of replicated results for each pathogen are split by effect direction. Those with an odds ratio less than one are represented by the blue bars to the left of the center line. Those with an odds ratio greater than one are represented by the red bars to the right of the center line.

Replicated Results  
[Protective | Risk]

|                       |            |            |            |            |            |            |            |            |            |            |             |            |            |            |            |
|-----------------------|------------|------------|------------|------------|------------|------------|------------|------------|------------|------------|-------------|------------|------------|------------|------------|
| HCV                   | 1<br>[0 1] | 2<br>[2 0] | 1<br>[0 1] | 1<br>[0 1] | 1<br>[0 1] | 2<br>[1 1] |            | 1<br>[0 1] | 3<br>[1 2] |            | 7<br>[3 4]  | 1<br>[0 1] | 2<br>[1 1] | 3<br>[0 3] |            |
| EBV                   | 1<br>[0 1] | 1<br>[1 0] |            | 2<br>[2 0] |            | 1<br>[0 1] |            | 1<br>[1 0] | 1<br>[1 0] | 3<br>[1 2] | 1<br>[1 0]  | 1<br>[1 0] | 3<br>[0 3] | 3<br>[1 2] |            |
| HBV                   | 1<br>[0 1] |            |            |            |            | 3<br>[1 2] |            | 1<br>[0 1] | 4<br>[3 1] | 1<br>[0 1] | 5<br>[3 2]  | 3<br>[1 2] | 3<br>[1 2] | 3<br>[0 3] | 1<br>[0 1] |
| HPV16                 |            |            |            |            |            | 1<br>[1 0] | 1<br>[1 0] | 1<br>[0 1] | 1<br>[1 0] | 2<br>[1 1] | 4<br>[3 1]  | 2<br>[1 1] | 4<br>[3 1] | 2<br>[0 2] |            |
| HSV1                  | 1<br>[0 1] |            | 1<br>[0 1] | 1<br>[0 1] |            | 1<br>[1 0] |            |            |            | 2<br>[0 2] | 1<br>[0 1]  | 3<br>[0 3] | 5<br>[0 5] | 4<br>[0 4] |            |
| <i>C. trachomatis</i> |            | 1<br>[1 0] |            |            |            | 1<br>[1 0] |            |            | 2<br>[2 0] | 3<br>[3 0] | 3<br>[3 0]  | 2<br>[2 0] | 4<br>[3 1] | 4<br>[0 4] |            |
| <i>H. pylori</i>      |            |            | 2<br>[0 2] | 1<br>[0 1] |            | 1<br>[1 0] |            |            | 2<br>[1 1] | 2<br>[2 0] | 11<br>[4 7] |            | 1<br>[0 1] | 2<br>[0 2] |            |
| HIV                   | 1<br>[0 1] |            |            |            |            |            | 1<br>[0 1] |            | 1<br>[1 0] | 1<br>[0 1] | 3<br>[2 1]  | 2<br>[0 2] | 4<br>[2 2] | 2<br>[0 2] |            |
| HPV18                 |            |            |            |            |            | 1<br>[1 0] |            | 1<br>[0 1] | 1<br>[1 0] | 1<br>[1 0] | 1<br>[1 0]  | 1<br>[0 1] | 1<br>[1 0] | 2<br>[0 2] |            |
| CMV                   |            |            |            |            |            | 2<br>[2 0] |            |            | 1<br>[0 1] | 4<br>[0 4] | 8<br>[1 7]  | 3<br>[0 3] | 3<br>[0 3] | 3<br>[0 3] |            |
| VZV                   | 1<br>[0 1] |            | 1<br>[0 1] |            |            |            |            |            | 1<br>[0 1] |            |             | 1<br>[1 0] | 1<br>[1 0] |            |            |
| BKV                   |            |            |            |            |            |            |            |            |            | 1<br>[1 0] | 1<br>[1 0]  |            | 1<br>[1 0] | 2<br>[1 1] |            |
| HSV2                  | 2<br>[0 2] |            |            |            |            |            |            |            | 2<br>[0 2] |            |             |            | 3<br>[0 3] |            |            |
| HHV6                  | 1<br>[0 1] |            |            |            |            |            |            | 1<br>[0 1] |            |            |             |            |            |            |            |
| <i>T. gondii</i>      |            |            |            |            |            |            |            |            |            | 1<br>[1 0] |             |            |            |            |            |

[A00-B99] Infectious

[C00-D49] Neoplasms

[D50-D89] Blood

[E00-E90] Endocrine, Nutritional, Metabolic

[F00-F99] Mental, Behavioral

[G00-G99] Nervous

[H00-H59] Eye

[H60-H95] Ear

[I00-I99] Circulatory

[J00-J99] Respiratory

[K00-K93] Digestive

[L00-L99] Skin, Subcutaneous

[M00-M99] Musculoskeletal

[N00-N99] Genitourinary

[O00-O99] Pregnancy, Childbirth

**Figure S4 | Heatmap of replicated results at the ICD10 chapter level.**

A heatmap showing the total number of replicated results for each pathogen across all diseases in an ICD10 chapter, which indicates broad disease classes. All cells are annotated with the total number of replicated results followed by, in square brackets, the number of these replicated results with odds ratios less than one, followed by those with odds ratios greater than one. White squares with no annotation indicate no replicated associations were found for that pathogen and any of the tested diseases in that ICD10 chapter.

|            |        | UKB   | TNX        |
|------------|--------|-------|------------|
| <b>Sex</b> | Female | 5,276 | 7,410,388  |
|            | Male   | 4,153 | 3,807,258  |
|            | Other  | 0     | 5,827      |
|            | Total  | 9,429 | 11,223,473 |

|            |                  |               |          |
|------------|------------------|---------------|----------|
| <b>Age</b> | Resolution: Mean | 67.5          | 46.3     |
|            | UKB: Month SD    | 8.1           | 17.3     |
|            | TNX: Year Range  | [43.8 - 82.6] | [0 - 91] |

|                       |                                           |       |            |
|-----------------------|-------------------------------------------|-------|------------|
| <b>Race/Ethnicity</b> | White                                     | 8,883 | 4,654,725  |
|                       | Asian                                     | 231   | 258,886    |
|                       | Black                                     | 140   | 1,664,492  |
|                       | Hispanic                                  | -     | 860,830    |
|                       | American Indian or Alaska Native          | -     | 36,516     |
|                       | Native Hawaiian or Other Pacific Islander | -     | 12,767     |
|                       | Other                                     | 175   | 3,735,257  |
|                       | Total                                     | 9,429 | 11,223,473 |

|            |       |               |   |
|------------|-------|---------------|---|
| <b>BMI</b> | Mean  | 27.3          | - |
|            | SD    | 4.8           | - |
|            | Range | [16.2 - 61.3] | - |
| n Imputed  |       | 32            | - |

|                                   |             |       |   |
|-----------------------------------|-------------|-------|---|
| <b>Townsend Deprivation Index</b> | Lowest 1/6  | 1,572 | - |
|                                   | Middle 2/3  | 6,285 | - |
|                                   | Highest 1/6 | 1,572 | - |
|                                   | Total       | 9,429 | 0 |
| n Imputed                         |             | 8     | - |

| <b>Number in House</b> |   |       |   |
|------------------------|---|-------|---|
| Alone                  |   | 1,712 | - |
|                        | 2 | 4,331 | - |
|                        | 3 | 1,524 | - |
|                        | 4 | 1,282 | - |
| >= 5                   |   | 514   | - |
| Unknown                |   | 66    | - |
| Total                  |   | 9,429 | 0 |

| <b>Tobacco Use</b> |  |       |   |
|--------------------|--|-------|---|
| Never              |  | 5,210 | - |
| Previous           |  | 3,218 | - |
| Current            |  | 949   | - |
| Unknown            |  | 52    | - |
| Total              |  | 9,429 | 0 |

| <b>Alcohol Use</b> |  |       |   |
|--------------------|--|-------|---|
| Never              |  | 417   | - |
| Previous           |  | 332   | - |
| Current            |  | 8,661 | - |
| Unknown            |  | 19    | - |
| Total              |  | 9,429 |   |

| <b>Number of Sex Partners</b> |  |       |   |
|-------------------------------|--|-------|---|
| 0 partners                    |  | 88    | - |
| 1 partner                     |  | 2,265 | - |
| 2-3                           |  | 1,838 | - |
| 4-5                           |  | 1,255 | - |
| > 5                           |  | 2,343 | - |
| Unknown                       |  | 1,640 | - |
| Total                         |  | 9,429 | 0 |

| <b>Same-sex Intercourse</b> |  |       |   |
|-----------------------------|--|-------|---|
| No                          |  | 8,204 | - |
| Yes                         |  | 283   | - |
| Unknown                     |  | 942   | - |
| Total                       |  | 9,429 | 0 |

**Table S1 | Summary statistics for additional covariates across both cohorts.**

This table contains the summary statistics for each of the ten additional health-related and sociodemographic variables that were considered as possible confounders. For continuous variables, the mean, standard deviation, and range are presented. For categorical variables, counts for each group are included. Note that the resolution for age differed between cohorts, with UKB having a resolution of one month, while TNX only provided a resolution of one year.

| <b>Covariate</b>           | <b>Ab Titer Assoc Test</b> | <b>Disease Status Assoc Test</b> |
|----------------------------|----------------------------|----------------------------------|
| Sex                        | t-test                     | Chi-squared                      |
| Age                        | linear regression          | t-test                           |
| BMI                        | linear regression          | t-test                           |
| Race                       | ANOVA                      | Chi-squared                      |
| Townsend Deprivation Index | ANOVA                      | Chi-squared                      |
| Number in House            | ANOVA                      | Chi-squared                      |
| Tobacco Use                | ANOVA                      | Chi-squared                      |
| Alcohol Use                | ANOVA                      | Chi-squared                      |
| Number of Sex Partners     | ANOVA                      | Chi-squared                      |
| Same-sex Intercourse       | ANOVA                      | Chi-squared                      |

**Table S2 | Univariate tests used to determine confounding.**

This table shows the type of univariate test that was performed between each covariate and the antibody titers as well as each covariate and disease status to determine if the covariate was confounding. For a covariate to be considered a confounder it had to be significantly associated (unadjusted  $p < 0.05$ ) separately with both disease status and antibody titer.
